# Supplementary material for: Unravelling the mechanism of neurotensin recognition by neurotensin receptor 1
Source: PubMed Central journal article supplement (PMC10710507; doi:10.1038/s41467-023-44010-7), 2023-12-09
Supplement: 41467_2023_44010_MOESM3_ESM.pdf [file 41467_2023_44010_MOESM3_ESM.pdf]

## Reporting Summary

Nature Portfolio wishes to improve the reproducibility of the work that we publish. This form provides structure for consistency and transparency in reporting. For further information on Nature Portfolio policies, see our [Editorial Policies](#) and the [Editorial Policy Checklist](#).

### Statistics

For all statistical analyses, confirm that the following items are present in the figure legend, table legend, main text, or Methods section.

n/a Confirmed

- |                                     |                                     |                                                                                                                                                                                                                                                            |
|-------------------------------------|-------------------------------------|------------------------------------------------------------------------------------------------------------------------------------------------------------------------------------------------------------------------------------------------------------|
| <input type="checkbox"/>            | <input checked="" type="checkbox"/> | The exact sample size ( $n$ ) for each experimental group/condition, given as a discrete number and unit of measurement                                                                                                                                    |
| <input type="checkbox"/>            | <input checked="" type="checkbox"/> | A statement on whether measurements were taken from distinct samples or whether the same sample was measured repeatedly                                                                                                                                    |
| <input checked="" type="checkbox"/> | <input type="checkbox"/>            | The statistical test(s) used AND whether they are one- or two-sided<br><i>Only common tests should be described solely by name; describe more complex techniques in the Methods section.</i>                                                               |
| <input checked="" type="checkbox"/> | <input type="checkbox"/>            | A description of all covariates tested                                                                                                                                                                                                                     |
| <input checked="" type="checkbox"/> | <input type="checkbox"/>            | A description of any assumptions or corrections, such as tests of normality and adjustment for multiple comparisons                                                                                                                                        |
| <input type="checkbox"/>            | <input checked="" type="checkbox"/> | A full description of the statistical parameters including central tendency (e.g. means) or other basic estimates (e.g. regression coefficient) AND variation (e.g. standard deviation) or associated estimates of uncertainty (e.g. confidence intervals) |
| <input checked="" type="checkbox"/> | <input type="checkbox"/>            | For null hypothesis testing, the test statistic (e.g. $F$ , $t$ , $r$ ) with confidence intervals, effect sizes, degrees of freedom and $P$ value noted<br><i>Give <math>P</math> values as exact values whenever suitable.</i>                            |
| <input checked="" type="checkbox"/> | <input type="checkbox"/>            | For Bayesian analysis, information on the choice of priors and Markov chain Monte Carlo settings                                                                                                                                                           |
| <input checked="" type="checkbox"/> | <input type="checkbox"/>            | For hierarchical and complex designs, identification of the appropriate level for tests and full reporting of outcomes                                                                                                                                     |
| <input checked="" type="checkbox"/> | <input type="checkbox"/>            | Estimates of effect sizes (e.g. Cohen's $d$ , Pearson's $r$ ), indicating how they were calculated                                                                                                                                                         |

*Our web collection on [statistics for biologists](#) contains articles on many of the points above.*

### Software and code

Policy information about [availability of computer code](#)

|                 |                                                                                                                                                                                                                                                                                                                          |
|-----------------|--------------------------------------------------------------------------------------------------------------------------------------------------------------------------------------------------------------------------------------------------------------------------------------------------------------------------|
| Data collection | Topspin vs3.2.7 (Bruker); ChronosHDX (Trajan); Pro-Data SX version 2.5 (Applied Photophysics); Octet BLI Discovery 12.2.1.18 (Sartorius)                                                                                                                                                                                 |
| Data analysis   | GraphPad Prism 9.3.1 (Graphpad Software, San Diego, CA); Topspin vs3.4 (Bruker); MNova (version: 10.0.2-15465, Mestrelab Research); DynamX 3.0 (Waters); Deuterios 2.0; Pro-Data SX version 2.5 (Applied Photophysics); Mathematica 13; Octet BLI Analysis 12.2.1.3 (Sartorius); Protein Lynx Global Server (PLGS) v3.0; |

For manuscripts utilizing custom algorithms or software that are central to the research but not yet described in published literature, software must be made available to editors and reviewers. We strongly encourage code deposition in a community repository (e.g. GitHub). See the Nature Portfolio [guidelines for submitting code & software](#) for further information.

### Data

Policy information about [availability of data](#)

All manuscripts must include a [data availability statement](#). This statement should provide the following information, where applicable:

- Accession codes, unique identifiers, or web links for publicly available datasets
- A description of any restrictions on data availability
- For clinical datasets or third party data, please ensure that the statement adheres to our [policy](#)

Our data availability statement: The mass spectrometry proteomics data have been deposited to the ProteomeXchange Consortium via the PRIDE75 partner repository with the dataset identifier PXD045464. Other data available from the corresponding author upon reasonable request. The NMR datasets (Figure 1, 2, S5, S6, S8, S9), the stopped-flow traces analysed in Figure 4b and Cell assay data (Figure S3) are available on Zenodo and can be accessed via <https://doi.org/10.5281/>

zenodo.10146660. PDB files referenced in this manuscript are available at the Protein Data Bank (<https://www.rcsb.org/>): 4XEE [<https://doi.org/10.2210/pdb4XEE/pdb>], 6YVR [<https://doi.org/10.2210/pdb6YVR/pdb>], 4BUO [<https://doi.org/10.2210/pdb4BUO/pdb>], 6Z4Q [<https://doi.org/10.2210/pdb6Z4Q/pdb>], 6Z66 [<https://doi.org/10.2210/pdb6Z66/pdb>], 6Z4S [<https://doi.org/10.2210/pdb6Z4S/pdb>], 6Z8N [<https://doi.org/10.2210/pdb6Z8N/pdb>], 6ZA8 [<https://doi.org/10.2210/pdb6ZA8/pdb>], 6ZIN [<https://doi.org/10.2210/pdb6ZIN/pdb>]. Source data are provided with this paper.

## Research involving human participants, their data, or biological material

Policy information about studies with [human participants or human data](#). See also policy information about [sex, gender \(identity/presentation\), and sexual orientation](#) and [race, ethnicity and racism](#).

|                                                                    |     |
|--------------------------------------------------------------------|-----|
| Reporting on sex and gender                                        | N/A |
| Reporting on race, ethnicity, or other socially relevant groupings | N/A |
| Population characteristics                                         | N/A |
| Recruitment                                                        | N/A |
| Ethics oversight                                                   | N/A |

Note that full information on the approval of the study protocol must also be provided in the manuscript.

## Field-specific reporting

Please select the one below that is the best fit for your research. If you are not sure, read the appropriate sections before making your selection.

Life sciences  Behavioural & social sciences  Ecological, evolutionary & environmental sciences

For a reference copy of the document with all sections, see [nature.com/documents/nr-reporting-summary-flat.pdf](https://www.nature.com/documents/nr-reporting-summary-flat.pdf)

## Life sciences study design

All studies must disclose on these points even when the disclosure is negative.

|                 |                                                                                                                                                                                                                                                                                                                                                                                                                                                                                                                                                                                                                                                   |
|-----------------|---------------------------------------------------------------------------------------------------------------------------------------------------------------------------------------------------------------------------------------------------------------------------------------------------------------------------------------------------------------------------------------------------------------------------------------------------------------------------------------------------------------------------------------------------------------------------------------------------------------------------------------------------|
| Sample size     | These are not population studies so no sample size calculation was performed. Sample size of 3 (as a minimum) was chosen for experiments to ensure reproducibility.                                                                                                                                                                                                                                                                                                                                                                                                                                                                               |
| Data exclusions | No data excluded                                                                                                                                                                                                                                                                                                                                                                                                                                                                                                                                                                                                                                  |
| Replication     | Cell assays performed n=3 (Fig S3 except Fig S3a n=4).<br>NMR spectra are representative data. Data presented are from samples made from different preparations. The NMR data in Figure S5 were collected on independent samples and were not used in other experiments. The STD experiments (Figure 1a,b,d,e) were collected on fresh samples of receptor from new preparations. Each spectrum in Figure 2, S6, S8, S9 was collected on samples made from new preparations.<br>HDX MS acquired on n=4 for NT and n=3 for SR142948A per time-point.<br>3-12 time traces were collected for each ligand concentration in stopped-flow experiments. |
| Randomization   | Not applicable. No organisms or subjects that require randomization were analysed.                                                                                                                                                                                                                                                                                                                                                                                                                                                                                                                                                                |
| Blinding        | Not applicable. No organisms or subjects that require blinding were analysed.                                                                                                                                                                                                                                                                                                                                                                                                                                                                                                                                                                     |

## Reporting for specific materials, systems and methods

We require information from authors about some types of materials, experimental systems and methods used in many studies. Here, indicate whether each material, system or method listed is relevant to your study. If you are not sure if a list item applies to your research, read the appropriate section before selecting a response.

### Materials & experimental systems

| n/a                                 | Involved in the study                                     |
|-------------------------------------|-----------------------------------------------------------|
| <input checked="" type="checkbox"/> | <input type="checkbox"/> Antibodies                       |
| <input type="checkbox"/>            | <input checked="" type="checkbox"/> Eukaryotic cell lines |
| <input checked="" type="checkbox"/> | <input type="checkbox"/> Palaeontology and archaeology    |
| <input checked="" type="checkbox"/> | <input type="checkbox"/> Animals and other organisms      |
| <input checked="" type="checkbox"/> | <input type="checkbox"/> Clinical data                    |
| <input checked="" type="checkbox"/> | <input type="checkbox"/> Dual use research of concern     |
| <input checked="" type="checkbox"/> | <input type="checkbox"/> Plants                           |

### Methods

| n/a                                 | Involved in the study                           |
|-------------------------------------|-------------------------------------------------|
| <input checked="" type="checkbox"/> | <input type="checkbox"/> ChIP-seq               |
| <input checked="" type="checkbox"/> | <input type="checkbox"/> Flow cytometry         |
| <input checked="" type="checkbox"/> | <input type="checkbox"/> MRI-based neuroimaging |

## Eukaryotic cell lines

Policy information about [cell lines and Sex and Gender in Research](#)

|                                                                   |                                                                                                                                                                                                                                     |
|-------------------------------------------------------------------|-------------------------------------------------------------------------------------------------------------------------------------------------------------------------------------------------------------------------------------|
| Cell line source(s)                                               | HEKT (internal stock), HEKF- Commercial source, ordered in August 2016 from Invitrogen (Cat #: R790-07). Cells expanded, passaged and many aliquots cryopreserved in 2016. Batch used here was expanded from one of these aliquots. |
| Authentication                                                    | Cell lines not authenticated                                                                                                                                                                                                        |
| Mycoplasma contamination                                          | Cells used in this study tested negative for mycoplasma.                                                                                                                                                                            |
| Commonly misidentified lines (See <a href="#">ICLAC</a> register) | no commonly misidentified cell lines were used                                                                                                                                                                                      |

## Plants

|                       |     |
|-----------------------|-----|
| Seed stocks           | N/A |
| Novel plant genotypes | N/A |
| Authentication        | N/A |
